# Supplementary material
Source: publisher figshare collection journal article supplement (https://acs.figshare.com/ndownloader/files/4392316)
Supplement: Supplementary file 1 [file 4392316]

 
data_pg8 
 
_audit_creation_method            SHELXL-97 
_chemical_name_systematic 
; 
 ? 
; 
_chemical_name_common             guajadial 
_chemical_melting_point           ? 
_chemical_formula_moiety          ? 
_chemical_formula_sum 
 'C30 H34 O5' 
_chemical_formula_weight          474.57 
 
loop_ 
 _atom_type_symbol 
 _atom_type_description 
 _atom_type_scat_dispersion_real 
 _atom_type_scat_dispersion_imag 
 _atom_type_scat_source 
 'C'  'C'   0.0181   0.0091 
 'International Tables Vol C Tables 4.2.6.8 and 6.1.1.4' 
 'H'  'H'   0.0000   0.0000 
 'International Tables Vol C Tables 4.2.6.8 and 6.1.1.4' 
 'O'  'O'   0.0492   0.0322 
 'International Tables Vol C Tables 4.2.6.8 and 6.1.1.4' 
 
_symmetry_cell_setting            Monoclinic 
_symmetry_space_group_name_H-M    P2(1) 
 
loop_ 
 _symmetry_equiv_pos_as_xyz 
 'x, y, z' 
 '-x, y+1/2, -z' 
 
_cell_length_a                    6.5752(10) 
_cell_length_b                    17.504(3) 
_cell_length_c                    10.7096(18) 
_cell_angle_alpha                 90.00 
_cell_angle_beta                  90.862(16) 
_cell_angle_gamma                 90.00 
_cell_volume                      1232.4(3) 
_cell_formula_units_Z             2 
_cell_measurement_temperature     293(2) 
_cell_measurement_reflns_used     3122 
_cell_measurement_theta_min       4.13 
_cell_measurement_theta_max       59.97 
 
_exptl_crystal_description        Block 
_exptl_crystal_colour             colorless 
_exptl_crystal_size_max           0.35 
_exptl_crystal_size_mid           0.30 
_exptl_crystal_size_min           0.28 
_exptl_crystal_density_meas       ? 
_exptl_crystal_density_diffrn     1.279 
_exptl_crystal_density_method     'not measured' 
_exptl_crystal_F_000              508 
_exptl_absorpt_coefficient_mu     0.688 
_exptl_absorpt_correction_type    none 
_exptl_absorpt_correction_T_min   ? 
_exptl_absorpt_correction_T_max   ? 
_exptl_absorpt_process_details    ? 
 
_exptl_special_details 
; 
 ? 
; 
 
_diffrn_ambient_temperature       293(2) 
_diffrn_radiation_wavelength      1.54178 
_diffrn_radiation_type            CuK\a 
_diffrn_radiation_source          'fine-focus sealed tube' 
_diffrn_radiation_monochromator   graphite 
_diffrn_measurement_device_type   'Oxford Gemini/CCD diffractometer' 
_diffrn_measurement_method        '\w scans' 
_diffrn_detector_area_resol_mean  'not measured' 
_diffrn_standards_number          'not measured' 
_diffrn_standards_interval_count  'not measured' 
_diffrn_standards_interval_time   'not measured' 
_diffrn_standards_decay_%         'not measured' 
_diffrn_reflns_number             3122 
_diffrn_reflns_av_R_equivalents   0.0556 
_diffrn_reflns_av_sigmaI/netI     0.0483 
_diffrn_reflns_limit_h_min        -7 
_diffrn_reflns_limit_h_max        4 
_diffrn_reflns_limit_k_min        -19 
_diffrn_reflns_limit_k_max        19 
_diffrn_reflns_limit_l_min        -10 
_diffrn_reflns_limit_l_max        12 
_diffrn_reflns_theta_min          4.13 
_diffrn_reflns_theta_max          59.97 
_reflns_number_total              2574 
_reflns_number_gt                 2134 
_reflns_threshold_expression      >2sigma(I) 
 
_computing_data_collection        'Oxford CrysAlisPro' 
_computing_cell_refinement        'Oxford CrysAlisPro' 
_computing_data_reduction         'XPREP in SHELXTL (Sheldrick, 1997)' 
_computing_structure_solution     'SHELXS-97 (Sheldrick, 1990)' 
_computing_structure_refinement   'SHELXL-97 (Sheldrick, 1997)' 
_computing_molecular_graphics     'XP (Siemens, 1998b)' 
_computing_publication_material   'SHELXTL (Sheldrick, 1997)' 
 
_chemical_absolute_configuration  'rm'

_refine_special_details 
; 
 Refinement of F^2^ against ALL reflections.  The weighted R-factor wR and 
 goodness of fit S are based on F^2^, conventional R-factors R are based 
 on F, with F set to zero for negative F^2^. The threshold expression of 
 F^2^ > 2sigma(F^2^) is used only for calculating R-factors(gt) etc. and is 
 not relevant to the choice of reflections for refinement.  R-factors based 
 on F^2^ are statistically about twice as large as those based on F, and R- 
 factors based on ALL data will be even larger. 
; 
 
_refine_ls_structure_factor_coef  Fsqd  
_refine_ls_matrix_type            full 
_refine_ls_weighting_scheme       calc  
_refine_ls_weighting_details 
 'calc w=1/[\s^2^(Fo^2^)+(0.2000P)^2^+0.0000P] where P=(Fo^2^+2Fc^2^)/3' 
_atom_sites_solution_primary      direct 
_atom_sites_solution_secondary    difmap 
_atom_sites_solution_hydrogens    geom 
_refine_ls_hydrogen_treatment     'constr' 
_refine_ls_extinction_method      none 
_refine_ls_extinction_coef        ? 
_refine_ls_abs_structure_details 
 'Flack H D (1983), Acta Cryst. A39, 876-881' 
_refine_ls_abs_structure_Flack    0.0(8) 
_refine_ls_number_reflns          2574 
_refine_ls_number_parameters      316 
_refine_ls_number_restraints      1 
_refine_ls_R_factor_all           0.1220 
_refine_ls_R_factor_gt            0.1093 
_refine_ls_wR_factor_ref          0.3317 
_refine_ls_wR_factor_gt           0.3091 
_refine_ls_goodness_of_fit_ref    1.472 
_refine_ls_restrained_S_all       1.471 
_refine_ls_shift/su_max           0.981 
_refine_ls_shift/su_mean          0.003 
 
loop_ 
 _atom_site_label 
 _atom_site_type_symbol 
 _atom_site_fract_x 
 _atom_site_fract_y 
 _atom_site_fract_z 
 _atom_site_U_iso_or_equiv 
 _atom_site_adp_type 
 _atom_site_occupancy 
 _atom_site_symmetry_multiplicity 
 _atom_site_calc_flag 
 _atom_site_refinement_flags 
 _atom_site_disorder_assembly 
 _atom_site_disorder_group 
O1 O -0.1128(10) 0.2409(4) 0.5521(7) 0.0644(19) Uani 1 1 d . . . 
O2 O 0.4163(8) 0.1949(4) 0.8427(6) 0.0534(15) Uani 1 1 d . . . 
H2C H 0.4280 0.1899 0.9186 0.08(4) Uiso 1 1 calc R . . 
O3 O 0.3944(12) 0.2602(5) 1.0586(7) 0.074(2) Uani 1 1 d . . . 
O4 O -0.1599(11) 0.3369(4) 0.9597(9) 0.074(2) Uani 1 1 d . . . 
H4B H -0.2661 0.3537 0.9294 0.06(3) Uiso 1 1 calc R . . 
O5 O -0.4320(10) 0.3615(4) 0.7915(10) 0.086(3) Uani 1 1 d . . . 
C1 C -0.2137(12) 0.0854(6) 0.2039(9) 0.053(2) Uani 1 1 d . . . 
H1A H -0.3179 0.0704 0.2636 0.064 Uiso 1 1 calc R . . 
C2 C -0.1632(11) 0.1714(5) 0.2225(8) 0.076(3) Uani 1 1 d . . . 
H2A H -0.0246 0.1807 0.1967 0.091 Uiso 1 1 calc R . . 
H2B H -0.2529 0.2016 0.1694 0.091 Uiso 1 1 calc R . . 
C3 C -0.1864(11) 0.1975(5) 0.3598(8) 0.078(3) Uani 1 1 d R . . 
H3A H -0.2604 0.2448 0.3578 0.094 Uiso 1 1 d R . . 
H3B H -0.2723 0.1607 0.3996 0.094 Uiso 1 1 d R . . 
C4 C 0.0013(16) 0.2100(7) 0.4483(10) 0.068(3) Uani 1 1 d . . . 
C5 C 0.1192(13) 0.1378(5) 0.4871(8) 0.051(2) Uani 1 1 d . . . 
H5A H 0.0176 0.0998 0.5111 0.061 Uiso 1 1 calc R . . 
C6 C 0.2486(14) 0.1008(5) 0.3889(9) 0.055(2) Uani 1 1 d . . . 
H6A H 0.3900 0.1131 0.4065 0.066 Uiso 1 1 calc R . . 
H6B H 0.2131 0.1228 0.3084 0.066 Uiso 1 1 calc R . . 
C7 C 0.2272(14) 0.0127(6) 0.3797(10) 0.058(2) Uani 1 1 d . . . 
H7A H 0.3326 -0.0071 0.3262 0.070 Uiso 1 1 calc R . . 
H7B H 0.2475 -0.0094 0.4621 0.070 Uiso 1 1 calc R . . 
C8 C 0.0210(13) -0.0119(5) 0.3283(9) 0.048(2) Uani 1 1 d . . . 
C9 C -0.0405(11) 0.0247(5) 0.2065(8) 0.050(2) Uani 1 1 d . . . 
H9A H 0.0805 0.0469 0.1684 0.060 Uiso 1 1 calc R . . 
C10 C -0.1701(13) -0.0159(6) 0.1023(10) 0.056(2) Uani 1 1 d . . . 
H10A H -0.0897 -0.0351 0.0339 0.067 Uiso 1 1 calc R . . 
H10B H -0.2588 -0.0554 0.1340 0.067 Uiso 1 1 calc R . . 
C11 C -0.2798(14) 0.0582(6) 0.0722(9) 0.057(2) Uani 1 1 d . . . 
C12 C -0.1812(14) 0.1028(8) -0.0302(13) 0.077(3) Uani 1 1 d . . . 
H12A H -0.2273 0.0837 -0.1098 0.115 Uiso 1 1 calc R . . 
H12B H -0.0361 0.0974 -0.0235 0.115 Uiso 1 1 calc R . . 
H12C H -0.2170 0.1558 -0.0230 0.115 Uiso 1 1 calc R . . 
C13 C -0.5109(12) 0.0544(6) 0.0509(8) 0.053(2) Uani 1 1 d . . . 
H13A H -0.5397 0.0372 -0.0326 0.080 Uiso 1 1 calc R . . 
H13B H -0.5685 0.1043 0.0624 0.080 Uiso 1 1 calc R . . 
H13C H -0.5689 0.0194 0.1095 0.080 Uiso 1 1 calc R . . 
C14 C 0.149(2) 0.2715(6) 0.4043(11) 0.077(3) Uani 1 1 d . . . 
H14A H 0.2601 0.2758 0.4631 0.115 Uiso 1 1 calc R . . 
H14B H 0.0794 0.3196 0.3982 0.115 Uiso 1 1 calc R . . 
H14C H 0.2006 0.2577 0.3239 0.115 Uiso 1 1 calc R . . 
C15 C -0.0986(16) -0.0596(6) 0.3881(11) 0.066(3) Uani 1 1 d . . . 
H15A H -0.2263 -0.0716 0.3551 0.079 Uiso 1 1 calc R . . 
H15B H -0.0552 -0.0812 0.4633 0.079 Uiso 1 1 calc R . . 
C1' C 0.2570(12) 0.1528(5) 0.6066(7) 0.0438(18) Uani 1 1 d . . . 
H1'A H 0.3814 0.1785 0.5800 0.053 Uiso 1 1 calc R . . 
C2' C 0.1486(10) 0.2050(5) 0.6988(9) 0.0466(19) Uani 1 1 d . . . 
C3' C -0.0290(13) 0.2428(5) 0.6661(12) 0.062(3) Uani 1 1 d . . . 
C4' C -0.1402(12) 0.2869(5) 0.7539(11) 0.056(2) Uani 1 1 d . . . 
C5' C -0.0611(13) 0.2988(5) 0.8742(9) 0.052(2) Uani 1 1 d . . . 
C6' C 0.1315(13) 0.2674(5) 0.9051(9) 0.050(2) Uani 1 1 d . . . 
C7' C 0.2322(13) 0.2228(5) 0.8147(9) 0.049(2) Uani 1 1 d . . . 
C8' C 0.3165(11) 0.0764(5) 0.6649(7) 0.0438(18) Uani 1 1 d . . . 
C9' C 0.5112(12) 0.0473(6) 0.6523(8) 0.053(2) Uani 1 1 d . . . 
H9'A H 0.6108 0.0765 0.6142 0.063 Uiso 1 1 calc R . . 
C10' C 0.5584(14) -0.0257(6) 0.6967(11) 0.065(3) Uani 1 1 d . . . 
H10C H 0.6900 -0.0445 0.6892 0.078 Uiso 1 1 calc R . . 
C11' C 0.4138(18) -0.0696(6) 0.7506(10) 0.068(3) Uani 1 1 d . . . 
H11A H 0.4455 -0.1188 0.7770 0.082 Uiso 1 1 calc R . . 
C12' C 0.2193(16) -0.0413(5) 0.7663(8) 0.055(2) Uani 1 1 d . . . 
H12D H 0.1217 -0.0707 0.8059 0.065 Uiso 1 1 calc R . . 
C13' C 0.1705(12) 0.0320(5) 0.7223(8) 0.0471(19) Uani 1 1 d . . . 
H13D H 0.0394 0.0509 0.7316 0.057 Uiso 1 1 calc R . . 
C14' C -0.3290(13) 0.3244(6) 0.7189(14) 0.075(4) Uani 1 1 d . . . 
H14D H -0.3745 0.3202 0.6366 0.090 Uiso 1 1 calc R . . 
C15' C 0.2252(16) 0.2822(6) 1.0249(10) 0.064(3) Uani 1 1 d . . . 
H15C H 0.1514 0.3109 1.0816 0.077 Uiso 1 1 calc R . . 
 
loop_ 
 _atom_site_aniso_label 
 _atom_site_aniso_U_11 
 _atom_site_aniso_U_22 
 _atom_site_aniso_U_33 
 _atom_site_aniso_U_23 
 _atom_site_aniso_U_13 
 _atom_site_aniso_U_12 
O1 0.066(4) 0.052(3) 0.074(5) -0.010(3) -0.030(3) 0.013(3) 
O2 0.046(3) 0.060(4) 0.054(4) -0.004(3) -0.008(2) 0.006(2) 
O3 0.092(5) 0.073(5) 0.056(4) -0.008(4) -0.014(4) 0.008(4) 
O4 0.069(4) 0.055(4) 0.098(6) -0.007(4) 0.029(4) 0.007(3) 
O5 0.047(3) 0.062(4) 0.150(9) 0.011(5) 0.023(4) -0.001(3) 
C1 0.043(4) 0.056(5) 0.062(6) -0.006(4) -0.004(4) -0.003(3) 
C2 0.073(6) 0.068(6) 0.086(8) -0.014(6) -0.034(6) 0.006(5) 
C3 0.069(6) 0.072(7) 0.094(9) -0.015(7) -0.002(6) 0.018(5) 
C4 0.085(6) 0.063(6) 0.056(6) 0.004(5) -0.031(5) 0.013(5) 
C5 0.055(4) 0.054(5) 0.044(5) 0.013(4) -0.001(4) -0.003(4) 
C6 0.073(5) 0.052(5) 0.039(5) 0.003(4) -0.010(4) -0.016(4) 
C7 0.070(5) 0.054(5) 0.051(5) -0.002(4) -0.008(4) 0.002(4) 
C8 0.057(4) 0.040(4) 0.047(5) -0.013(4) 0.008(4) 0.007(3) 
C9 0.040(4) 0.063(5) 0.046(5) 0.000(4) 0.002(4) -0.003(4) 
C10 0.053(5) 0.059(5) 0.056(6) -0.012(5) 0.003(4) 0.006(4) 
C11 0.062(5) 0.056(5) 0.053(5) -0.005(5) 0.006(4) -0.004(4) 
C12 0.045(5) 0.091(8) 0.094(8) 0.026(7) 0.001(5) -0.002(4) 
C13 0.052(4) 0.067(5) 0.041(4) -0.006(4) -0.003(4) -0.008(4) 
C14 0.122(9) 0.054(5) 0.054(6) 0.003(5) -0.002(6) 0.012(6) 
C15 0.078(6) 0.061(6) 0.060(6) 0.006(5) 0.005(5) -0.003(5) 
C1' 0.048(4) 0.052(5) 0.031(4) 0.002(4) 0.000(3) -0.003(3) 
C2' 0.033(3) 0.054(4) 0.052(5) 0.004(4) -0.007(3) -0.006(3) 
C3' 0.043(4) 0.050(5) 0.092(8) -0.001(5) -0.008(5) -0.006(4) 
C4' 0.038(4) 0.048(4) 0.084(7) 0.007(5) 0.017(4) -0.004(3) 
C5' 0.055(4) 0.050(5) 0.051(5) -0.002(4) 0.013(4) -0.002(4) 
C6' 0.057(4) 0.048(4) 0.045(5) 0.006(4) 0.016(4) 0.003(3) 
C7' 0.049(4) 0.049(4) 0.050(5) 0.006(4) 0.006(4) -0.011(3) 
C8' 0.046(4) 0.053(5) 0.033(4) 0.002(4) -0.010(3) 0.004(3) 
C9' 0.046(4) 0.065(5) 0.047(5) -0.006(4) -0.006(4) 0.009(4) 
C10' 0.049(5) 0.070(6) 0.075(7) 0.002(5) -0.019(5) 0.012(4) 
C11' 0.093(7) 0.050(5) 0.062(6) -0.006(5) -0.024(5) 0.018(5) 
C12' 0.078(6) 0.049(5) 0.036(4) -0.001(4) -0.012(4) -0.008(4) 
C13' 0.049(4) 0.056(5) 0.036(4) 0.002(4) -0.004(3) 0.001(3) 
C14' 0.038(4) 0.056(6) 0.130(11) 0.008(6) 0.014(6) 0.002(4) 
C15' 0.082(7) 0.054(5) 0.057(6) -0.012(5) 0.013(5) -0.004(5) 
 
_geom_special_details 
; 
 All esds (except the esd in the dihedral angle between two l.s. planes) 
 are estimated using the full covariance matrix.  The cell esds are taken 
 into account individually in the estimation of esds in distances, angles 
 and torsion angles; correlations between esds in cell parameters are only 
 used when they are defined by crystal symmetry.  An approximate (isotropic) 
 treatment of cell esds is used for estimating esds involving l.s. planes. 
; 
 
loop_ 
 _geom_bond_atom_site_label_1 
 _geom_bond_atom_site_label_2 
 _geom_bond_distance 
 _geom_bond_site_symmetry_2 
 _geom_bond_publ_flag 
O1 C3' 1.332(14) . ? 
O1 C4 1.455(14) . ? 
O2 C7' 1.336(11) . ? 
O3 C15' 1.226(13) . ? 
O4 C5' 1.312(12) . ? 
O5 C14' 1.224(15) . ? 
C1 C11 1.544(14) . ? 
C1 C2 1.554(13) . ? 
C1 C9 1.557(13) . ? 
C2 C3 1.5499 . ? 
C3 C4 1.560(12) . ? 
C4 C14 1.530(18) . ? 
C4 C5 1.537(13) . ? 
C5 C6 1.509(14) . ? 
C5 C1' 1.579(11) . ? 
C6 C7 1.552(13) . ? 
C7 C8 1.518(13) . ? 
C8 C15 1.319(14) . ? 
C8 C9 1.503(13) . ? 
C9 C10 1.565(13) . ? 
C10 C11 1.517(14) . ? 
C11 C12 1.501(15) . ? 
C11 C13 1.534(13) . ? 
C1' C8' 1.524(13) . ? 
C1' C2' 1.529(13) . ? 
C2' C3' 1.383(12) . ? 
C2' C7' 1.385(14) . ? 
C3' C4' 1.427(16) . ? 
C4' C5' 1.398(15) . ? 
C4' C14' 1.449(14) . ? 
C5' C6' 1.415(13) . ? 
C6' C7' 1.416(13) . ? 
C6' C15' 1.439(15) . ? 
C8' C13' 1.386(12) . ? 
C8' C9' 1.387(12) . ? 
C9' C10' 1.397(15) . ? 
C10' C11' 1.357(17) . ? 
C11' C12' 1.384(16) . ? 
C12' C13' 1.402(14) . ? 
 
loop_ 
 _geom_angle_atom_site_label_1 
 _geom_angle_atom_site_label_2 
 _geom_angle_atom_site_label_3 
 _geom_angle 
 _geom_angle_site_symmetry_1 
 _geom_angle_site_symmetry_3 
 _geom_angle_publ_flag 
C3' O1 C4 119.9(7) . . ? 
C11 C1 C2 118.2(8) . . ? 
C11 C1 C9 90.2(7) . . ? 
C2 C1 C9 120.2(6) . . ? 
C3 C2 C1 112.6(5) . . ? 
C2 C3 C4 122.0(6) . . ? 
O1 C4 C14 108.1(9) . . ? 
O1 C4 C5 111.3(8) . . ? 
C14 C4 C5 110.0(8) . . ? 
O1 C4 C3 96.0(7) . . ? 
C14 C4 C3 114.3(9) . . ? 
C5 C4 C3 116.2(9) . . ? 
C6 C5 C4 116.9(8) . . ? 
C6 C5 C1' 108.3(7) . . ? 
C4 C5 C1' 111.3(8) . . ? 
C5 C6 C7 114.8(8) . . ? 
C8 C7 C6 112.6(8) . . ? 
C15 C8 C9 122.5(9) . . ? 
C15 C8 C7 122.6(10) . . ? 
C9 C8 C7 114.9(8) . . ? 
C8 C9 C1 119.6(8) . . ? 
C8 C9 C10 124.2(8) . . ? 
C1 C9 C10 84.6(6) . . ? 
C11 C10 C9 90.9(7) . . ? 
C12 C11 C10 113.0(8) . . ? 
C12 C11 C13 110.6(8) . . ? 
C10 C11 C13 117.4(8) . . ? 
C12 C11 C1 112.9(9) . . ? 
C10 C11 C1 86.7(7) . . ? 
C13 C11 C1 114.4(8) . . ? 
C8' C1' C2' 112.2(7) . . ? 
C8' C1' C5 109.1(7) . . ? 
C2' C1' C5 110.8(6) . . ? 
C3' C2' C7' 116.2(9) . . ? 
C3' C2' C1' 121.5(8) . . ? 
C7' C2' C1' 122.1(7) . . ? 
O1 C3' C2' 123.8(10) . . ? 
O1 C3' C4' 114.1(8) . . ? 
C2' C3' C4' 122.1(10) . . ? 
C5' C4' C3' 120.1(8) . . ? 
C5' C4' C14' 118.4(10) . . ? 
C3' C4' C14' 121.4(11) . . ? 
O4 C5' C4' 122.5(9) . . ? 
O4 C5' C6' 119.0(9) . . ? 
C4' C5' C6' 118.4(8) . . ? 
C5' C6' C7' 118.7(8) . . ? 
C5' C6' C15' 120.5(8) . . ? 
C7' C6' C15' 120.7(8) . . ? 
O2 C7' C2' 117.7(8) . . ? 
O2 C7' C6' 118.7(8) . . ? 
C2' C7' C6' 123.6(8) . . ? 
C13' C8' C9' 118.9(8) . . ? 
C13' C8' C1' 119.9(7) . . ? 
C9' C8' C1' 120.9(8) . . ? 
C8' C9' C10' 120.2(9) . . ? 
C11' C10' C9' 120.6(9) . . ? 
C10' C11' C12' 120.2(9) . . ? 
C11' C12' C13' 119.6(10) . . ? 
C8' C13' C12' 120.4(8) . . ? 
O5 C14' C4' 123.8(13) . . ? 
O3 C15' C6' 125.5(9) . . ? 
 
_diffrn_measured_fraction_theta_max    0.936 
_diffrn_reflns_theta_full              59.97 
_diffrn_measured_fraction_theta_full   0.936 
_refine_diff_density_max    0.762 
_refine_diff_density_min   -0.359 
_refine_diff_density_rms    0.091 
